# Supplementary material for: A comparative study of α-Ni(OH)2 and Ni nanoparticle supported ZIF-8@reduced graphene oxide-derived nitrogen doped carbon for electrocatalytic ethanol oxidation
Source: Royal Society of Chemistry journal article supplement (doi:10.1039/d3ra08208c), 2024-01-01
Supplement: d3ra08208c1.pdf [file d3ra08208c1.pdf]

**A comparative study of  $\alpha$ -Ni(OH)<sub>2</sub> and Ni nanoparticles supported ZIF-8@reduced graphene oxide- derived nitrogen doped carbon for electrocatalytic ethanol oxidation**

**Soliman Gamal, Doaa A Kospa, Amr Awad Ibrahim\*, Awad I. Ahmed, A.M.A. Ouf**

*Department of Chemistry, Faculty of Science, Mansoura University, Al-Mansoura 35516, Egypt.*

**Supplementary data**

**Fig. S1:** (a) N<sub>2</sub> adsorption-desorption isotherms and (b) the corresponding distributions of pore diameters of ZIF-8, ZIF@rGO, ZNC@rGO, and Ni(OH)<sub>2</sub>/ZNC@rGO obtained from the desorption branch using the Barrett–Joyner–Halenda (BJH) method.

**Fig. S2: XPS of GO,** (a) Total survey and high-resolution spectra of (b) C1s and (c) O1s.

**Fig. S3:** (a) High magnification SEM image and (b) SEM of elemental mapping region of Ni(OH)<sub>2</sub>/ZNC@rGO, and (c) EDX mapping of Ni(OH)<sub>2</sub>/ZNC@rGO, (d) C, (e) O, (f) N, (g) Zn, and (h) Ni.

**Fig. S4:** EDX analysis of Ni(OH)<sub>2</sub>/ZNC@rGO.

**Fig. S5:** CV curves of (a) ZIF-8, ZIF-8@rGO, and ZNC@rGO and (b) Ni/ZNC@rGO,  $\alpha$ -Ni(OH)<sub>2</sub>, and Ni(OH)<sub>2</sub>/ZNC@rGO recorded at 50 mV s<sup>-1</sup> in 1M KOH.

**Fig. S6:** CV curves recorded in 1M KOH in the potential range of 0- 0.1 V at different scan rates for (a) ZIF-8, (b) ZIF-8@rGO, (c) ZNC@rGO, (d) Ni/ ZNC@rGO, (e)  $\alpha$ Ni(OH)<sub>2</sub>, and (f) Ni(OH)<sub>2</sub>/ ZNC@rGO.

**Fig. S7:** CV curves of (a) ZIF-8, (b) ZIF-8@rGO, (c) ZNC@rGO, (d) Ni/ ZNC@rGO, (e)  $\alpha$ -Ni(OH)<sub>2</sub> and (f) Ni(OH)<sub>2</sub>/ ZNC@rGO in the absence and presence of 1M ethanol at a scan rate of 50 mV s<sup>-1</sup>.

**Fig. S8:** CV curve of the as-prepared catalysts in 1M KOH + 1M Ethanol at a scan rate of 50 mV s<sup>-1</sup>.

**Fig. S9:** CV curves recorded in 1M KOH in the potential range of -0.2- 0.6 V at different scan rates for (a) ZIF-8@rGO, (b) ZNC@rGO, (c) Ni/ ZNC@rGO, (d)  $\alpha$ -Ni(OH)<sub>2</sub>, and (e) Ni(OH)<sub>2</sub>/ ZNC@rGO catalysts.

**Fig. S10:** Linear relationship of anodic (I<sub>pa</sub>) and cathodic current (I<sub>pc</sub>) densities of (a) ZIF-8@rGO, (b) ZNC@rGO, (c) Ni/ZNC@rGO, and (d)  $\alpha$ -Ni(OH)<sub>2</sub> versus the square root of scan rates.

**Fig. S11:** Linear relationship of anodic ( $I_{pa}$ ) and cathodic current ( $I_{pc}$ ) densities of (a) ZIF-8@rGO, (b) ZNC@rGO, (c) Ni/ZNC@rGO, and (d)  $\alpha$ -Ni(OH)<sub>2</sub> versus the scan rates.

**Fig. S12:** CV of (a) ZIF-8@rGO, (b) ZNC@rGO, Ni/ ZNC@rGO, (d)  $\alpha$ -Ni(OH)<sub>2</sub> and (e) Ni(OH)<sub>2</sub>/ ZNC@rGO catalysts in 1M KOH with different concentrations of ethanol (0.1- 2.0 M).

**Fig. S13:** CV of Ni(OH)<sub>2</sub>/ ZNC@rGO in (a) 1M of alkaline and acidic electrolyte and (b) 1M of EtOH+ 1M of alkaline or acidic medium.

**Fig. S14:** CV of (a) ZIF-8@rGO, (b) ZNC@rGO, (c) Ni/ ZNC@rGO, (d)  $\alpha$ -Ni(OH)<sub>2</sub> and (e) Ni(OH)<sub>2</sub>/ ZNC@rGO catalysts in 1M EtOH with different concentrations of KOH electrolyte (0.1- 2.0 M) and (f) effect of concentration of the KOH electrolyte in electrocatalytic ethanol oxidation.

**Fig. S15:** CVs curves for 900 cycles from -0.2- 0.6 V at a scan rate of 10 mV s<sup>-1</sup> in 1M KOH+ 1M EtOH using Ni/ ZNC@rGO.

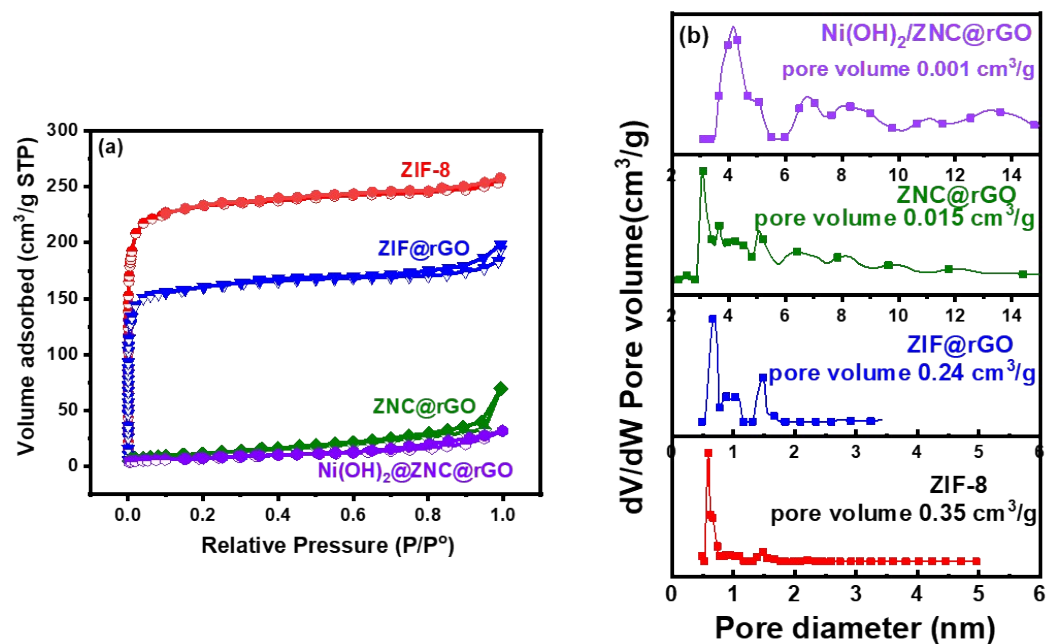

**Fig. S1:** (a) N<sub>2</sub> adsorption-desorption isotherms and (b) the corresponding distributions of pore diameters of ZIF-8, ZIF@rGO, ZNC@rGO, and Ni(OH)<sub>2</sub>/ZNC@rGO obtained from the desorption branch using the Barrett–Joyner–Halenda (BJH) method.

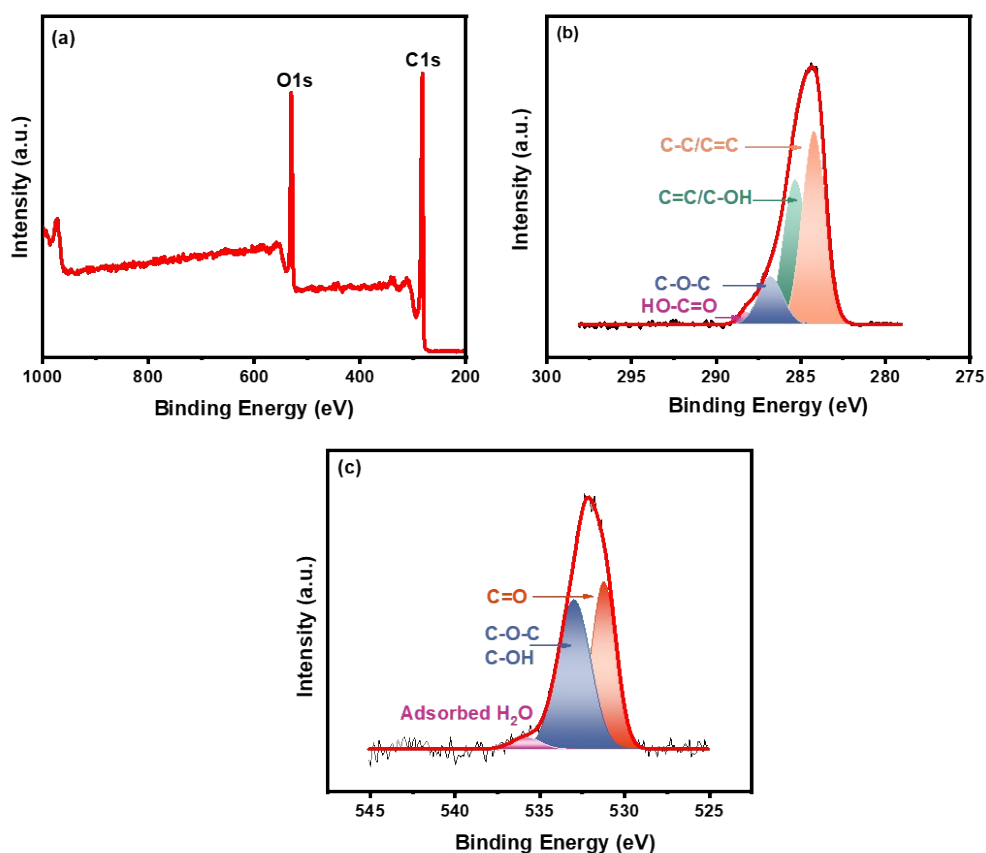

**Fig. S2:** XPS of GO, (a) Total survey and high-resolution spectra of (b) C1s and (c) O1s.

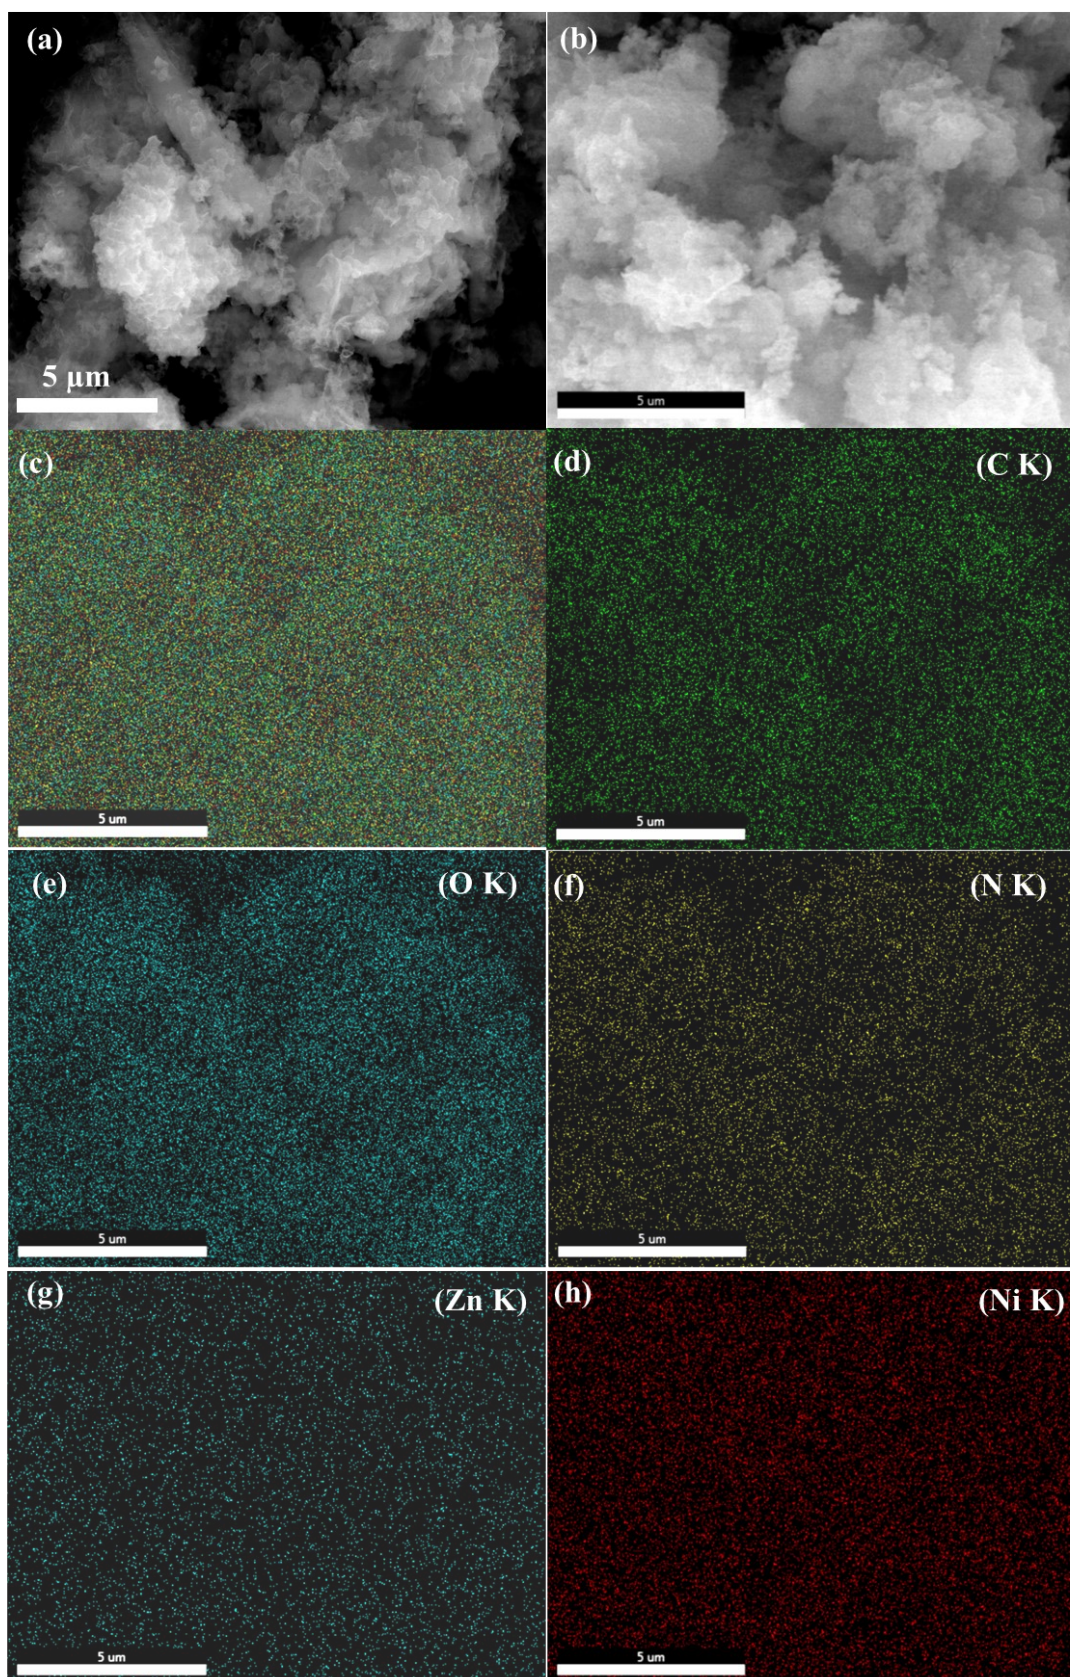

**Fig. S3:** (a) High magnification SEM image and (b) SEM of elemental mapping region of  $\text{Ni(OH)}_2/\text{ZNC}@r\text{GO}$ , and (c) EDX mapping of  $\text{Ni(OH)}_2/\text{ZNC}@r\text{GO}$ , (d) C, (e) O, (f) N, (g) Zn, and (h) Ni.

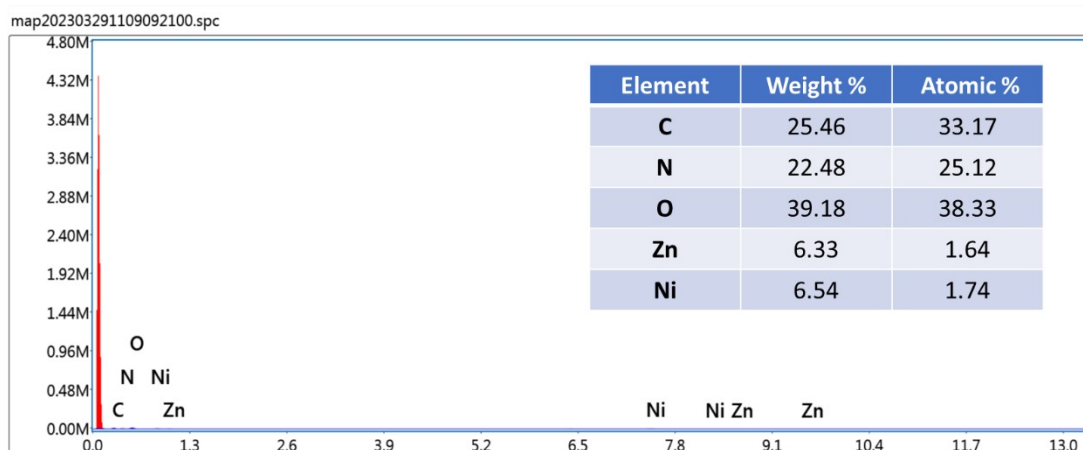

**Fig. S4:** EDX analysis of Ni(OH)<sub>2</sub>/ZNC@rGO catalyst.

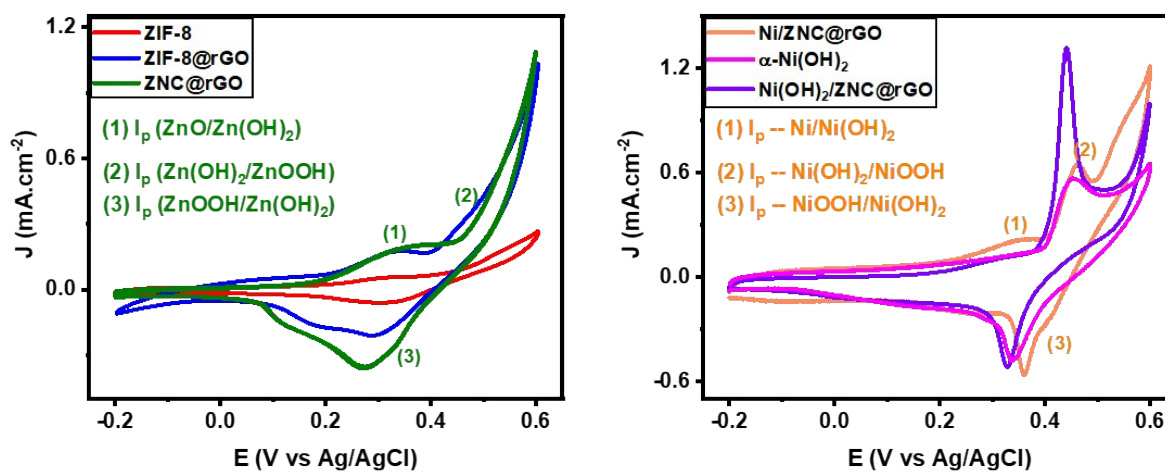

**Fig. S5:** CV curves of (a) ZIF-8, ZIF-8@rGO, and ZNC@rGO and (b) Ni/ZNC@rGO, α-Ni(OH)<sub>2</sub>, and Ni(OH)<sub>2</sub>/ZNC@rGO recorded at 50 mV s<sup>-1</sup> in 1M KOH.

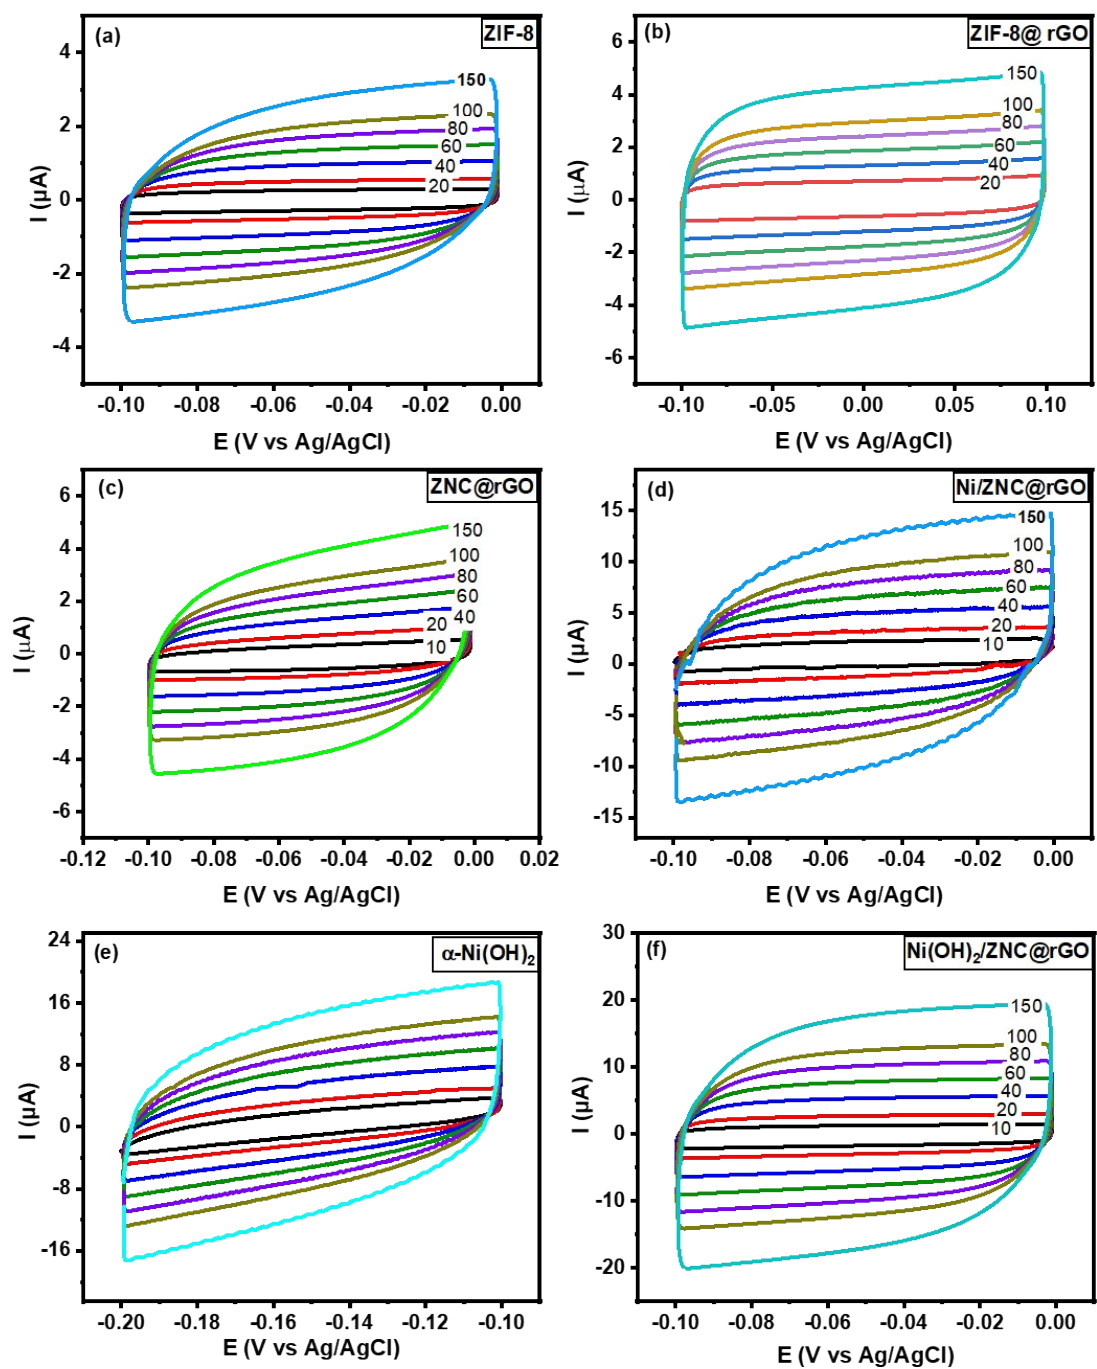

**Fig. S6:** CV curves recorded in 1M KOH in the potential range of 0- 0.1 V at different scan rates for (a) ZIF-8, (b) ZIF-8@rGO, (c) ZNC@rGO, (d) Ni/ ZNC@rGO, (e)  $\alpha$ Ni(OH)<sub>2</sub>, and (f) Ni(OH)<sub>2</sub>/ ZNC@rGO.

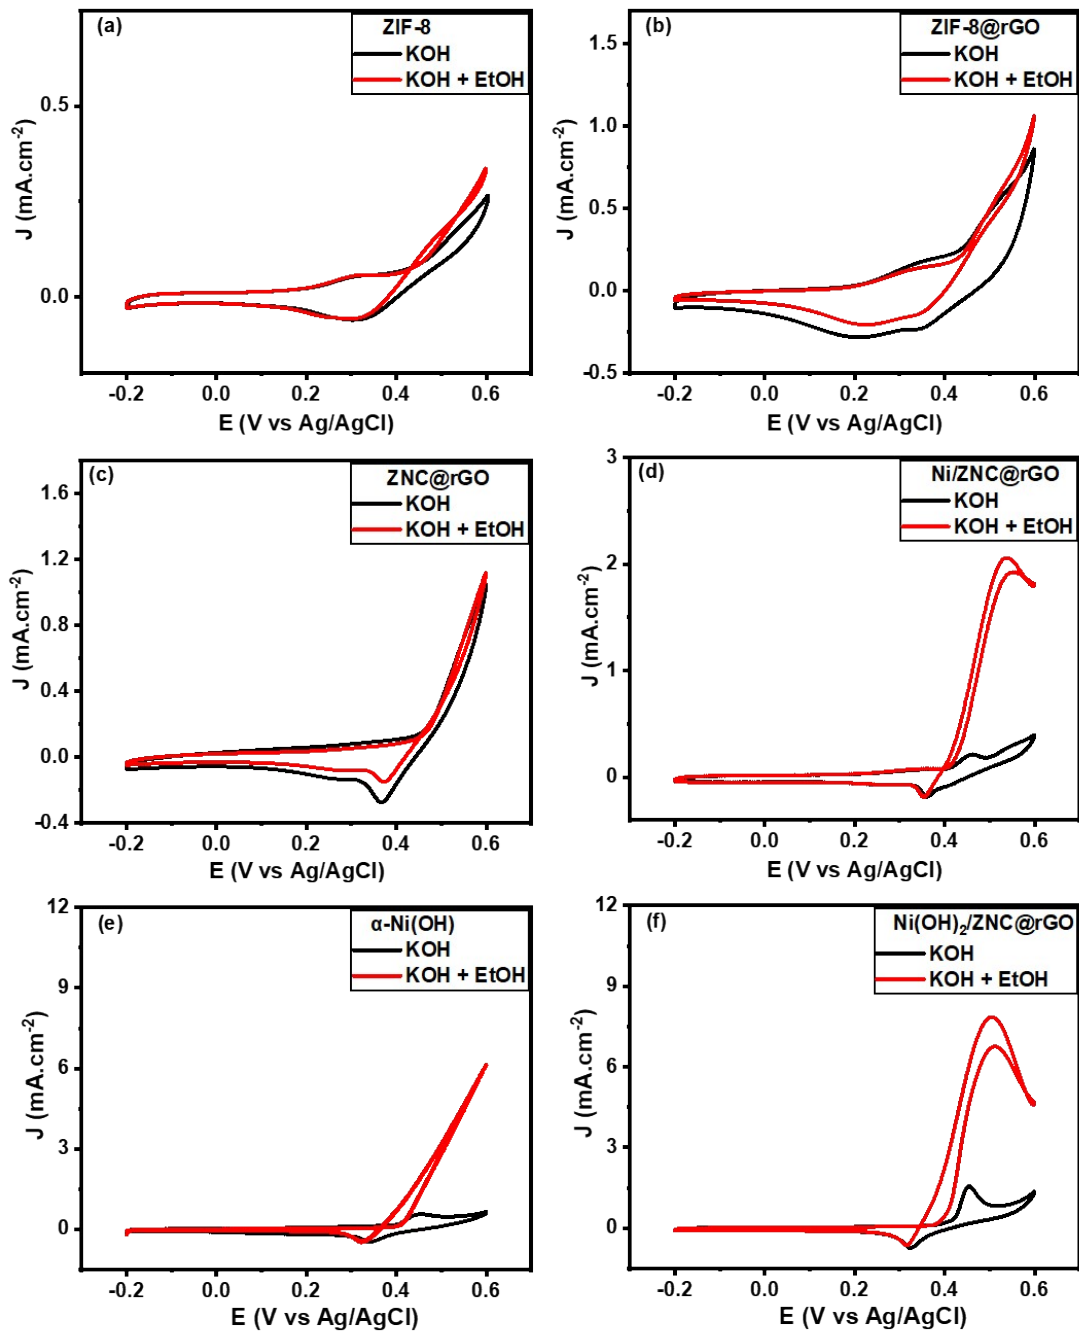

**Fig. S7:** CV curves of (a) ZIF-8, (b) ZIF-8@rGO, (c) ZNC@rGO, (d) Ni/ ZNC@rGO, (e)  $\alpha$ -Ni(OH)<sub>2</sub> and (f) Ni(OH)<sub>2</sub>/ ZNC@rGO in the absence and presence of 1M ethanol at a scan rate of 50 mV s<sup>-1</sup>.

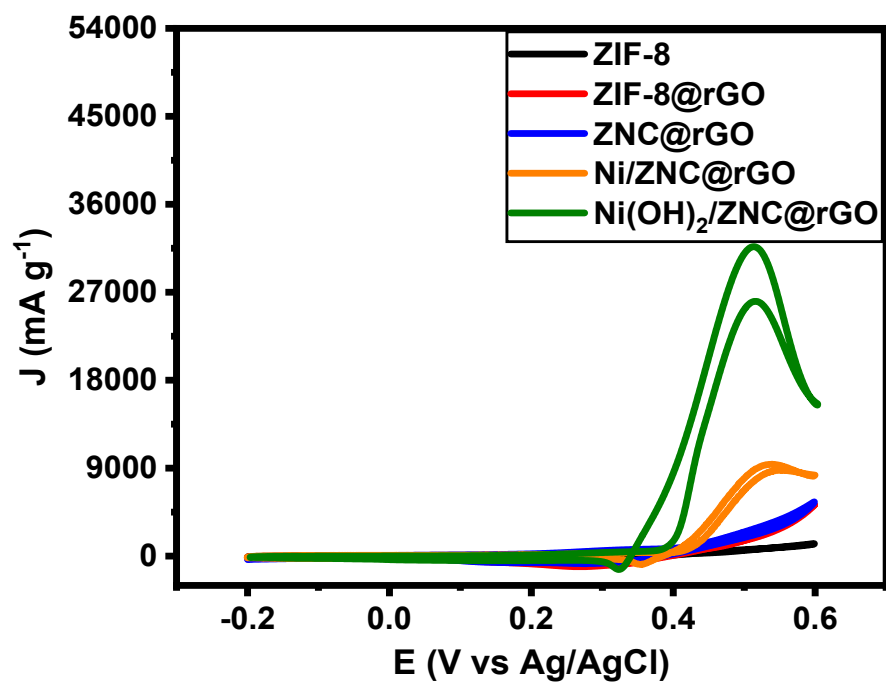

**Fig. S8:** CV curve of the as-prepared catalysts in 1M KOH + 1M Ethanol at a scan rate of 50  $\text{mV s}^{-1}$ .



**Table 1: Comparison of the prepared catalyst for EOR efficiency with some modified electrodes vs Ag/AgCl.**

| Working electrode                                              | C <sub>EtOH</sub> (M) | E <sub>onset</sub> (V) | E <sub>pa</sub> (V) | I <sub>pa</sub> (mA/cm <sup>2</sup> ) | Ref.             |
|----------------------------------------------------------------|-----------------------|------------------------|---------------------|---------------------------------------|------------------|
| NiCo/ErN-GO/CCE                                                | 0.1                   | 0.38                   | 0.81                | 64.23                                 | 1                |
| Ni(II)(Phen) <sub>2</sub> /rGO-modified PGE                    | 1.0                   | 0.4                    | 0.53                | 0.81                                  |                  |
| NiPPy/GCE                                                      | 0.9                   | ---                    | 0.55                | 8.50                                  | 2                |
| Ni/p(NMA)/MCPE                                                 | 0.4                   | 0.46                   | 0.66                | 1.80                                  | 3                |
| CPE@[Ni(cis-salcn)]                                            | 0.5                   | 0.42                   | 0.55                | 2.60                                  | 4                |
| CM-ZnO                                                         | 2.0                   | 0.40                   | 0.58                | 35.0                                  | 5                |
| Cu <sub>2</sub> O/PPy/CPE                                      | 0.2                   | 0.58                   | 0.80                | 2.25                                  | 6                |
| 4-trifluoromethylphenyl (TFMP)-Pt/C                            | 1.0                   | -0.489                 | -----               | 776                                   | 7                |
| NiO@PPC-600                                                    | 1.0                   | 1.1<br>(vs RHE)        | 1.4<br>(vs RHE)     | 231.8                                 | 8                |
| Ni <sub>3</sub> Fe <sub>2</sub> O <sub>3</sub> /Cu             | 1.0                   | 0.31                   | 0.476               | 0.492                                 | 9                |
| Cu/Ni <sub>3</sub> Fe <sub>2</sub> O <sub>3</sub>              |                       | 0.31                   | 0.510               | 0.644                                 |                  |
| Microbead-encapsulated ZnO particles derived from coffee waste | 2.0                   | 0.4                    | 0.5                 | 35                                    | 5                |
| Ag/Ag <sub>2</sub> O                                           | 1.5                   | 0.43                   | 0.5                 | 69                                    | 10               |
| <b>Ni(OH)<sub>2</sub>/ ZNC@rGO</b>                             | <b>1.0</b>            | <b>0.34</b>            | <b>0.51</b>         | <b>8.30</b>                           | <b>This work</b> |

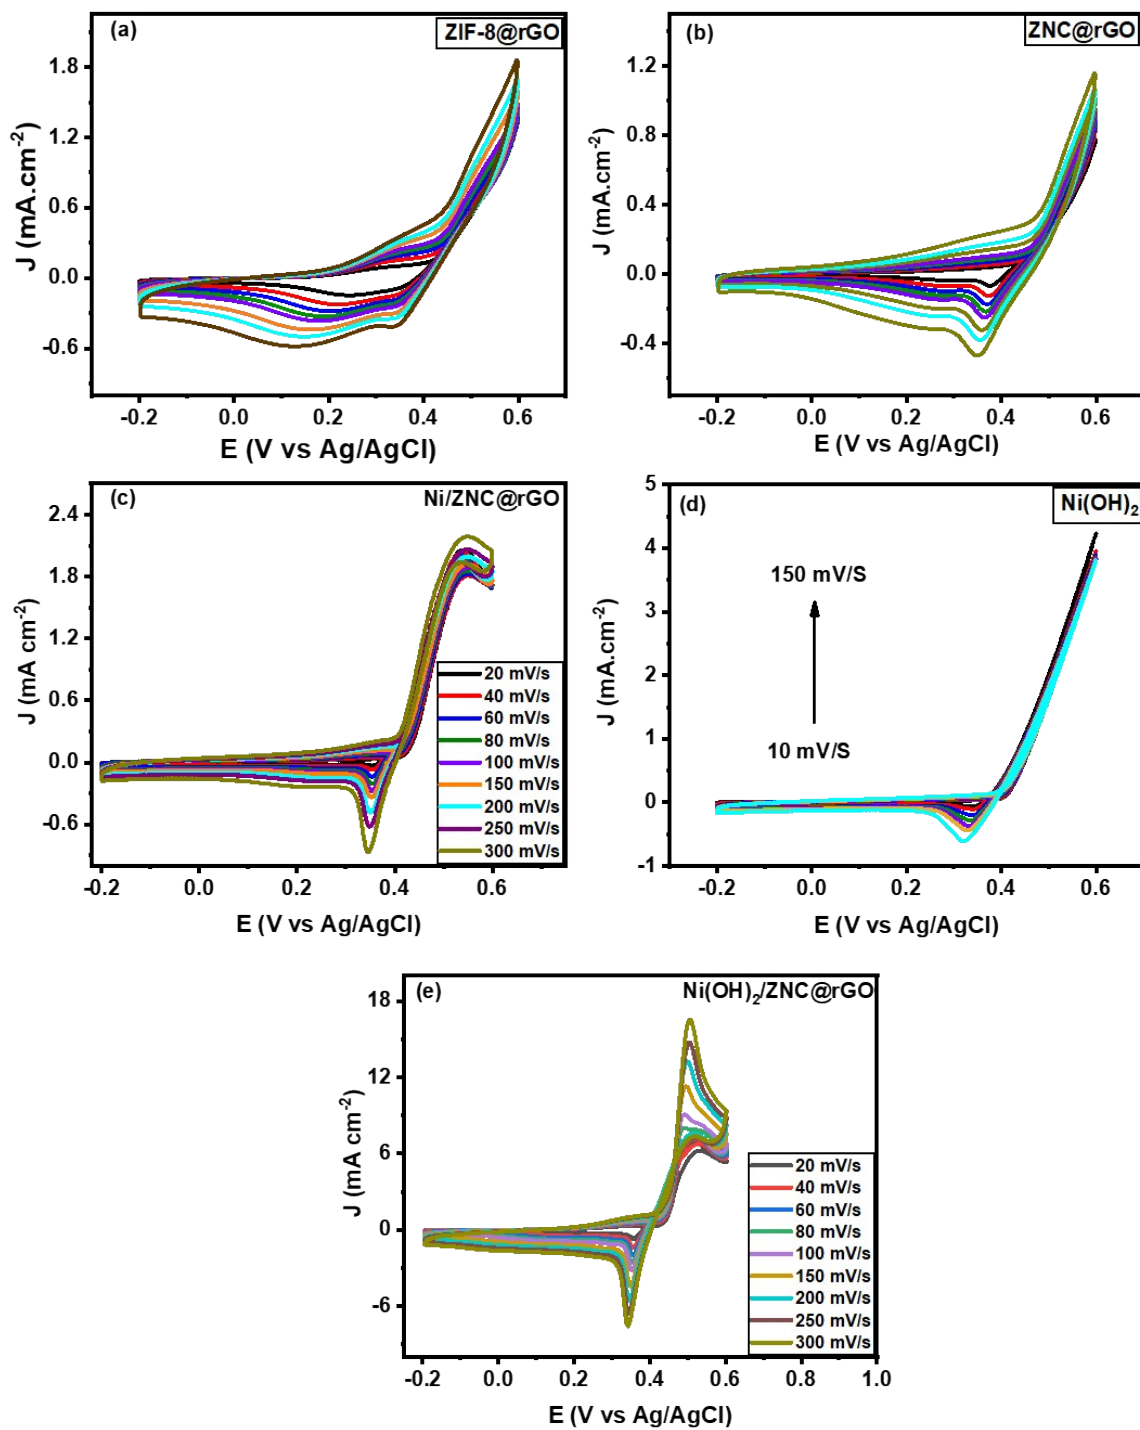

**Fig. S9:** CV curves recorded in 1M KOH in the potential range of -0.2- 0.6 V at different scan rates for (a) ZIF-8@rGO, (b) ZNC@rGO, (c) Ni/ ZNC@rGO, (d)  $\alpha$ -Ni(OH)<sub>2</sub>, and (e) Ni(OH)<sub>2</sub>/ ZNC@rGO catalysts.

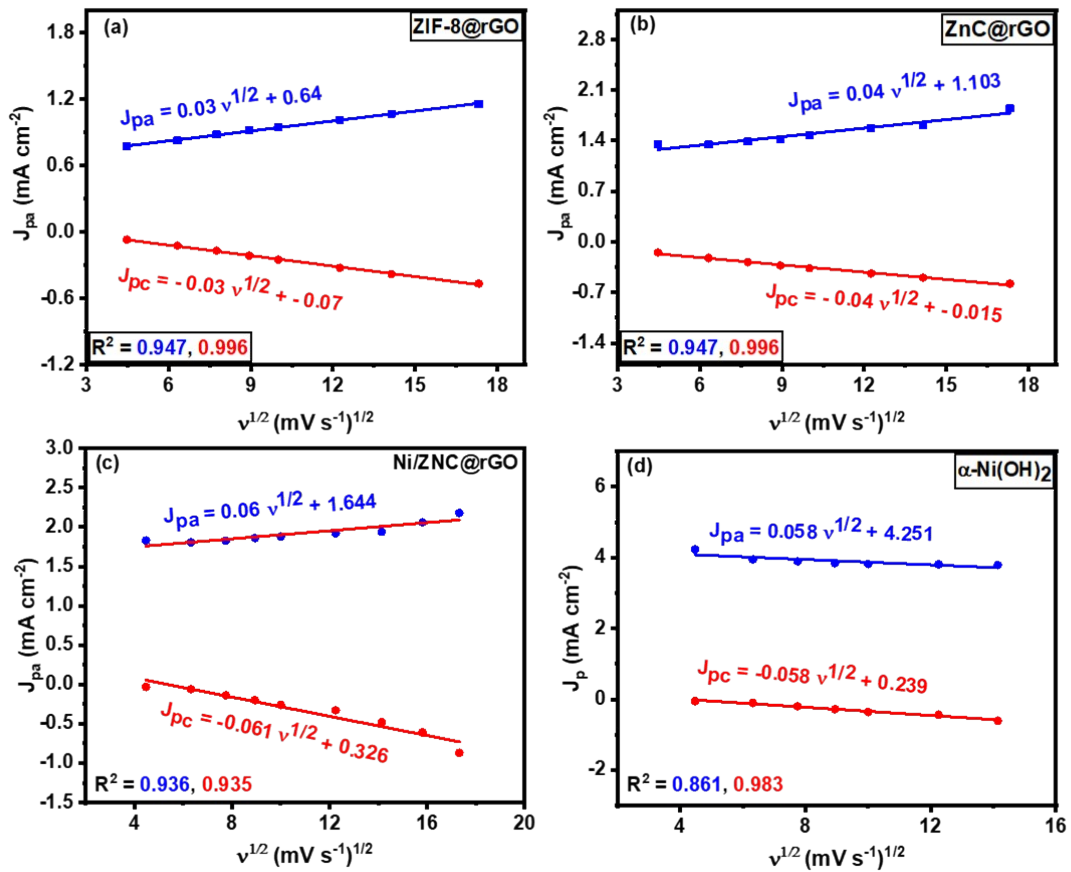

**Fig. S10:** Linear relationship of anodic ( $I_{pa}$ ) and cathodic current ( $I_{pc}$ ) densities of (a) ZIF-8@rGO, (b) ZNC@rGO, (c) Ni/ZNC@rGO, and (d)  $\alpha$ -Ni(OH)<sub>2</sub> versus the square root of scan rates.

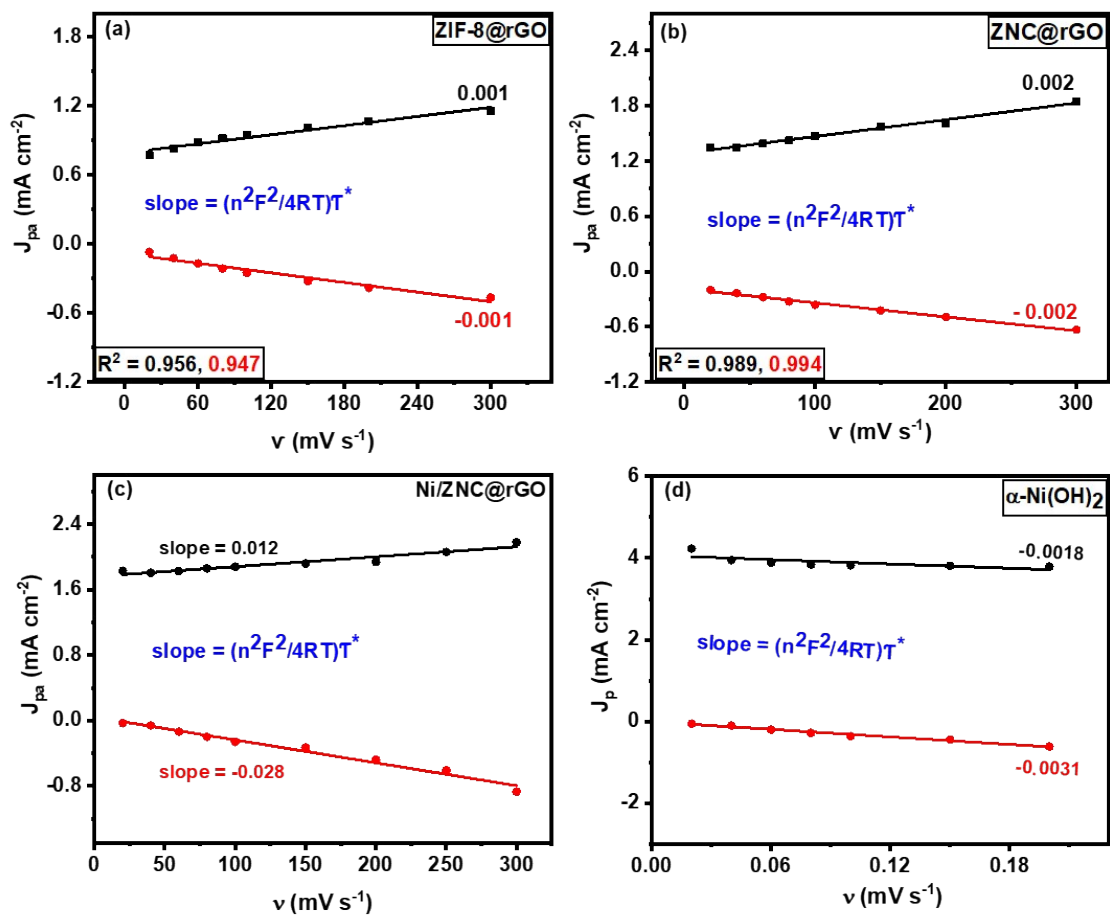

**Fig. S11:** Linear relationship of anodic ( $I_{pa}$ ) and cathodic current ( $I_{pc}$ ) densities of (a) ZIF-8@rGO, (b) ZNC@rGO, (c) Ni/ZNC@rGO, and (d)  $\alpha\text{-Ni(OH)}_2$  versus the scan rates.

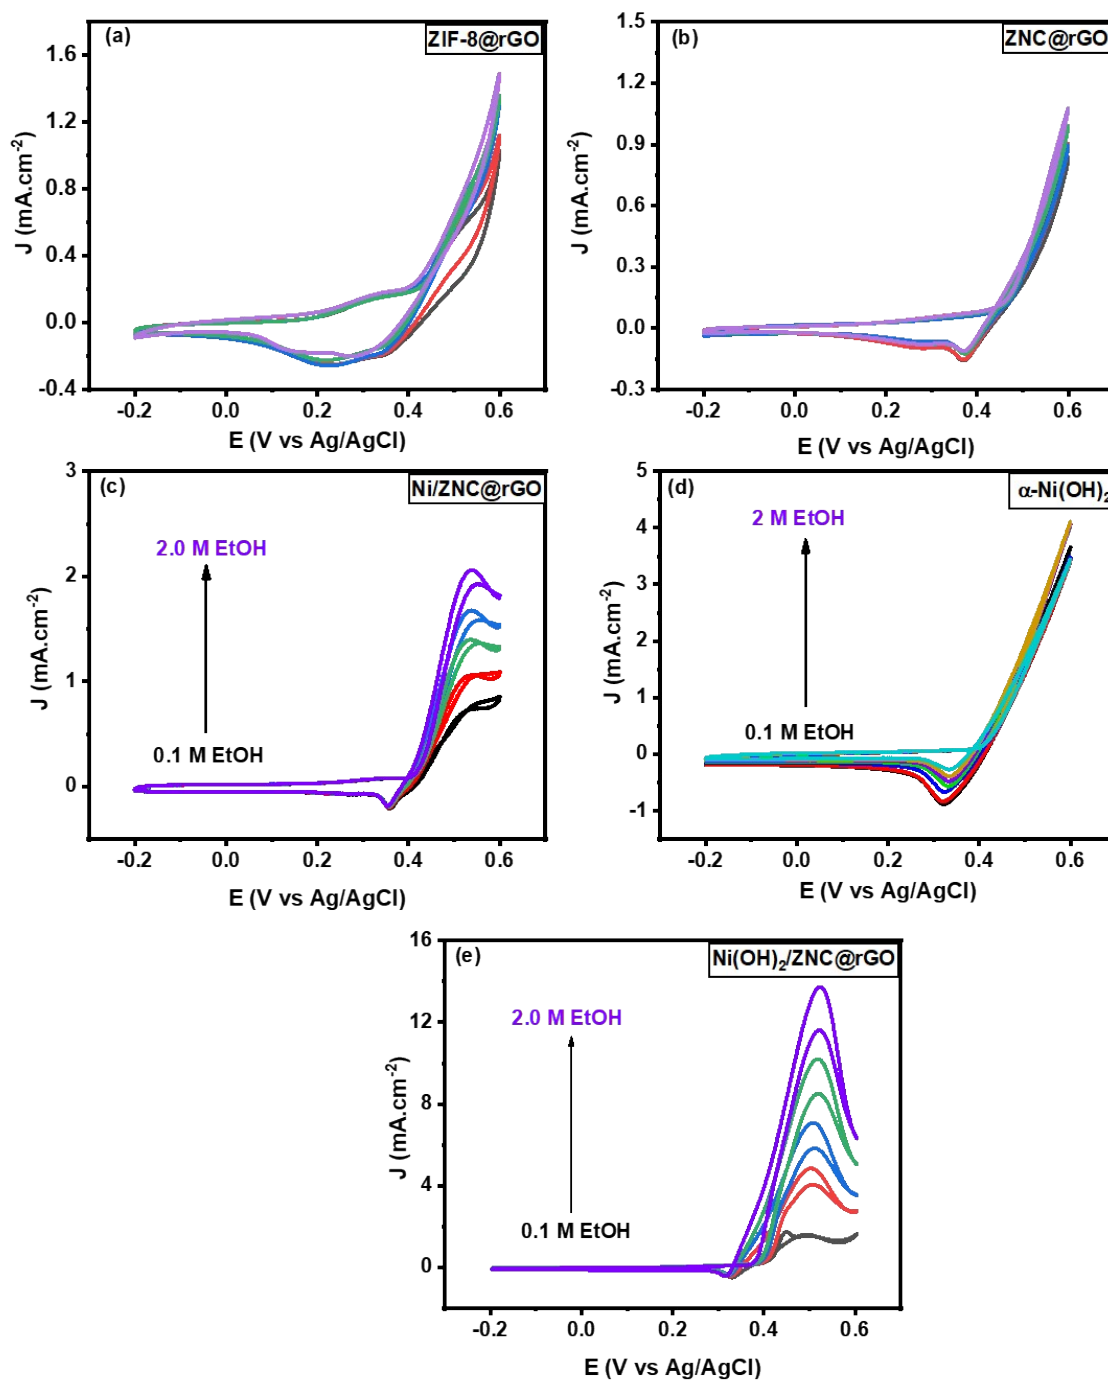

**Fig. S12:** CV of (a) ZIF-8@rGO, (b) ZNC@rGO, Ni/ ZNC@rGO, (d)  $\alpha$ -Ni(OH)<sub>2</sub> and (e) Ni(OH)<sub>2</sub>/ ZNC@rGO catalysts in 1M KOH with different concentrations of ethanol (0.1- 2.0 M).

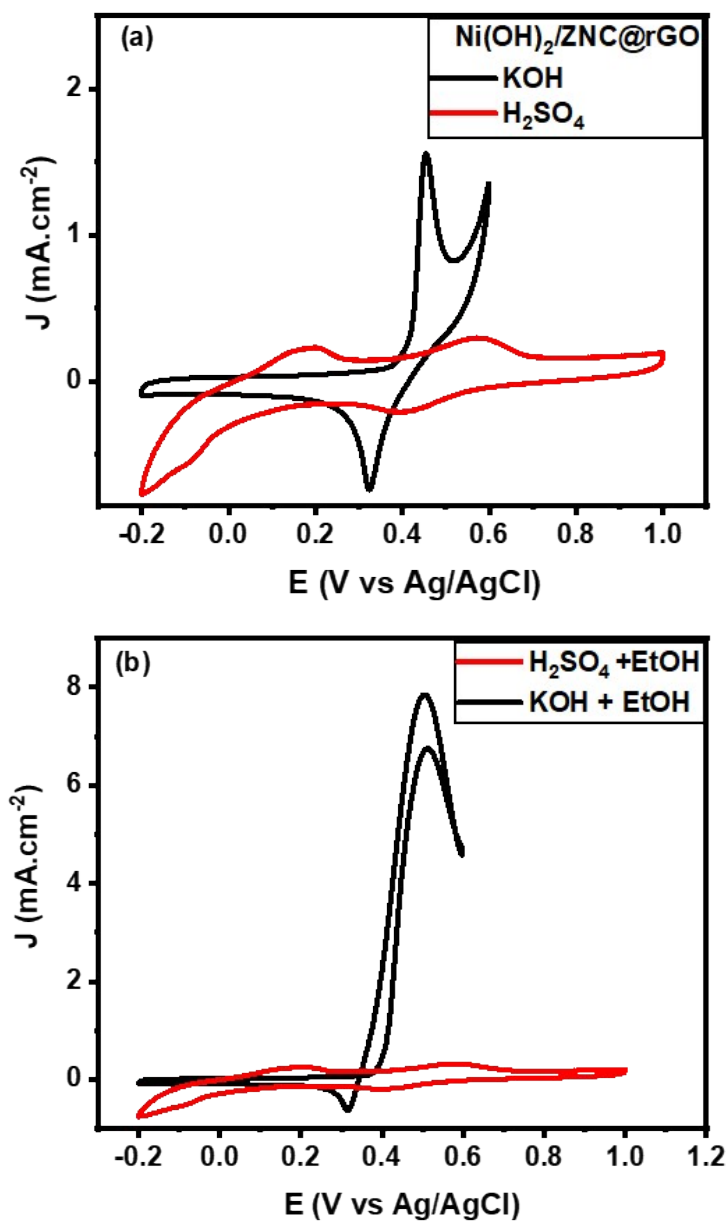

**Fig. S13:** CV of Ni(OH)<sub>2</sub>/ ZNC@rGO in (a) 1M of alkaline and acidic electrolyte and (b) 1M of EtOH+ 1M of alkaline or acidic medium.

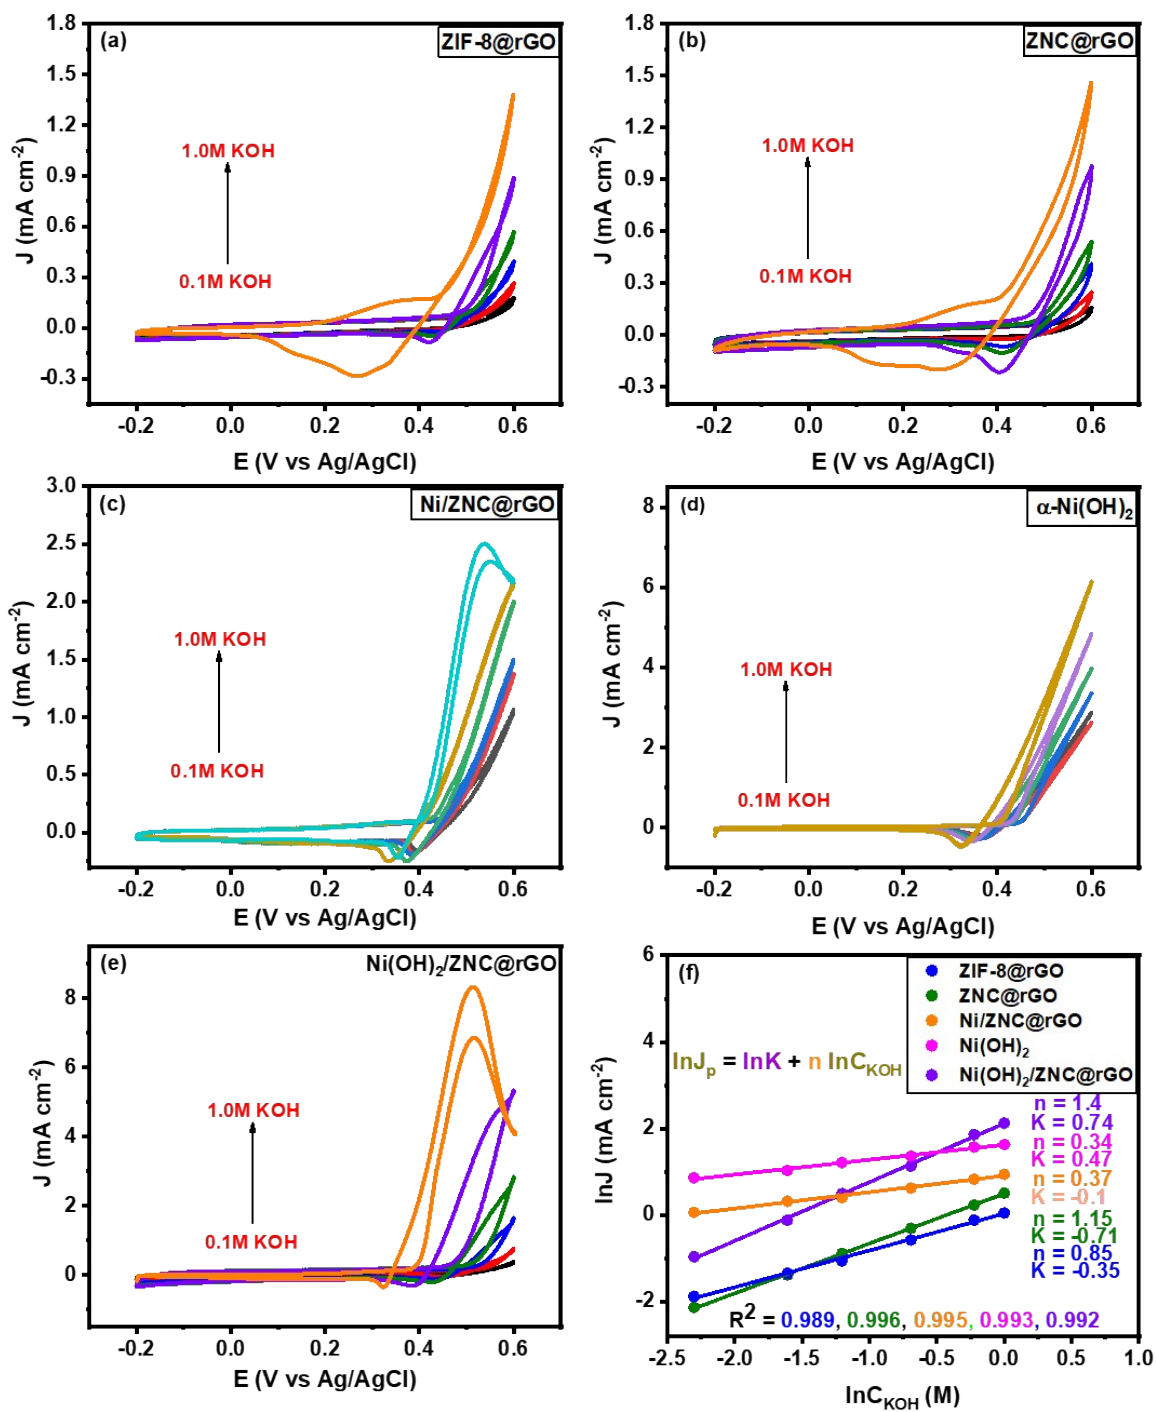

**Fig. S14:** CV of (a) ZIF-8@rGO, (b) ZNC@rGO, (c) Ni/ ZNC@rGO, (d)  $\alpha$ -Ni(OH)<sub>2</sub> and (e) Ni(OH)<sub>2</sub>/ ZNC@rGO catalysts in 1M EtOH with different concentrations of KOH electrolyte (0.1- 1.0 M) and (f) effect of concentration of the KOH electrolyte in electrocatalytic ethanol oxidation.

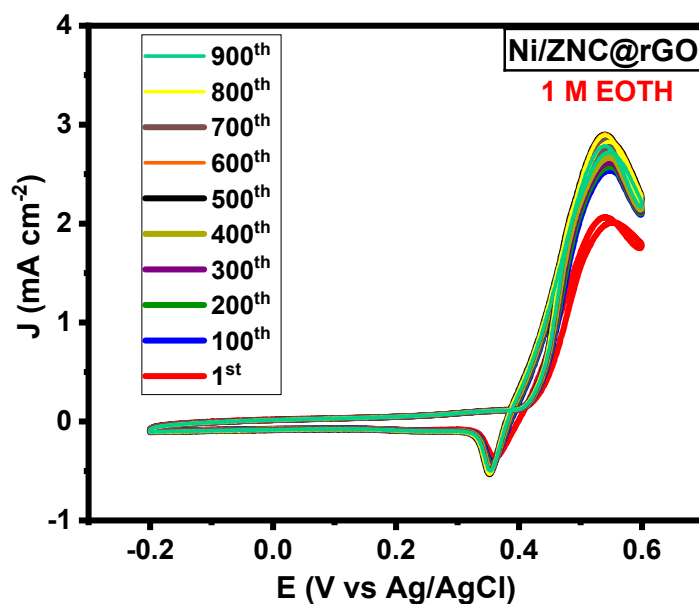

**Fig. S15:** CVs curves for 900 cycles from -0.2- 0.6 V at a scan rate of 10 mV s<sup>-1</sup> in 1M KOH+ 1M EtOH using Ni/ ZNC@rGO.

## References

1. K. Rahmani and B. Habibi, *RSC Adv*, 2019, **9**, 34050-34064.
2. A. Ehsani, M. G. Mahjani, M. Jafarian and A. Naeemy, *Electrochim Acta*, 2012, **71**, 128-133.
3. J.-B. Raoof, A. Omrani, R. Ojani and F. Monfared, *Journal of Macromolecular Science, Part A*, 2013, 546-541, **50**,
4. G. V. Lima, L. dos Santos Mello, E. R. Dockal and M. Firmino de Oliveira, *Microchemical Journal*, 2022, **175**, 107209.
5. Z. K. Ghouri, K. Elsaid, A. Abdel-Wahab, A. Abdala and M. Z. Farhad, *J Mater Sci: Mater Electron*, 2020, **31**, 6530-6537.
6. A. El Attar, L. Oularbi, S. Chemchoub and M. El Rhazi, *Int J Hydrogen Energy*, 2020, **45**, 8887-8898.
7. C. Han, Y. Lyu, S. Wang, B. Liu, Y. Zhang, J. Lu and H. Du, *Carbon Energy*, 2023, **5**.
8. N. Gao, L. Gao, X. Zhang, Y. Zhang and T. Hu, *J Alloys Compd*, 20.169485, **947**, 23
9. M. Ghalkhani, R. Abdullah Mirzaie, A. Banimostafa, E. Sohoulil and E. Hashemi, *Int J Hydrogen Energy*, 2023, **48**, 21214-21223.
10. M. G. A. Saleh, S. A. El Wanees, I. D. Alruwaili, A. Akremi, A. M. Elbasiony and M. Brakat, *Int. J. Electrochem. Sci.*, 2023, **18**, 100372.
